---

1     **Harmonic patterns embedding ictal EEG signals in focal epilepsy:**  
2                                   **new insight into the epileptogenic zone**

3     Lingli Hu,<sup>1,2</sup> Lingqi Ye,<sup>1</sup> Hongyi Ye,<sup>1</sup> Xiaochen Liu,<sup>3</sup> Kai Xiong,<sup>4</sup> Yuanming Zhang,<sup>3</sup> Zhe Zheng,<sup>5</sup> Hongjie  
4     Jiang,<sup>5</sup> Cong Chen,<sup>1</sup> Zhongjin Wang,<sup>1</sup> Jiping Zhou,<sup>6</sup> Yingcai Wu,<sup>4</sup> Kejie Huang,<sup>3</sup> Junming Zhu,<sup>2,5</sup> Zhong  
5     Chen,<sup>7</sup> Meiping Ding,<sup>1</sup> Dongping Yang,<sup>8\*</sup> Shuang Wang<sup>1,2\*</sup>

6

7     **Author affiliations:**

8     1 Department of Neurology and Epilepsy Center, Second Affiliated Hospital, School of Medicine,  
9     Zhejiang University, Hangzhou, China

10    2 Nanhu Brain-computer Interface Institute, Hangzhou, China

11    3 College of Information Science and Electronic Engineering, Zhejiang University, Hangzhou, China

12    4 School of Computer Science and Technology, Zhejiang University, Hangzhou, China

13    5 Department of Neurosurgery, Second Affiliated Hospital, School of Medicine, Zhejiang University,  
14    Hangzhou, China

15    6 Department of Neurology, Wayne State University/Detroit Medical Center, Detroit, MI, USA

16    7 Key Laboratory of Neuropharmacology and Translational Medicine of Zhejiang Province, School of  
17    Pharmaceutical Sciences, Zhejiang Chinese Medical University, Hangzhou, China

18    8 Research Center for Frontier Fundamental Studies, Zhejiang Lab, Hangzhou, China

19    **\*Correspondence to :**

20    Shuang Wang\*

21 Department of Neurology and Epilepsy Center, Second Affiliated Hospital, School of Medicine,

22 Zhejiang University, Hangzhou 310009, China.

23 E-mail: [wangs77@zju.edu.cn](mailto:wangs77@zju.edu.cn).

24 Dongping Yang\*

25 Research Center for Frontier Fundamental Studies, Zhejiang Lab, Hangzhou 311100, China.

26 E-mail: [dpyang@zhejianglab.com](mailto:dpyang@zhejianglab.com).

27 **Keywords:** harmonic pattern; ictal EEG; epileptogenic zone; nonlinear phenomena; epilepsy

28 surgery.

29

30 **Abstract**

31 The EEG biomarkers for identifying epileptogenic zone (EZ) need further refinement. Through  
32 time-frequency analysis, we identified a unique ictal spectral structure, referred to as the “harmonic  
33 pattern” (H pattern), during seizure onset or propagation in stereo-EEG signals of focal epilepsy  
34 patients. The H pattern, observed within specific EEG segments, often appeared simultaneously  
35 across different brain regions at a consistent fundamental frequency, highlighting a crucial stage in  
36 seizure propagation characterized by inter-regional synchronization. The dominant H pattern, which is  
37 identified as those above the third quartile of band numbers, demonstrated greater nonlinearity  
38 compared to the non-dominant H pattern, as evidenced by bispectral analysis. The waveforms  
39 associated with the dominant H pattern were more stereotyped and showed increased skewness  
40 and/or asymmetry. Remarkably, the complete removal of areas exhibiting the dominant H pattern was  
41 independently associated with favorable surgical outcomes. The H pattern provides unique insights into  
42 ictal neural dynamics and introduces a novel approach for measuring the EZ over an extended time  
43 window.

44 **Impact statement**

45 Hu et al. report that this distinct nonlinear spectral feature signifies a stereotyped waveform change and  
46 identifies a 'uniform frequency component' within the ictal network as a key stage of seizure  
47 propagation.

48

## 49 **Introduction**

50 Epilepsy is a chronic brain disorder characterized by paroxysmal episodes of behavioral, psychiatric, or  
51 neurological symptoms, resulting from abnormal, excessive, and synchronous cortical neuronal activity,  
52 as observed on electroencephalography (EEG). The epileptogenic zone (EZ), defined as the primary  
53 site of ictal discharge organization, refers to the areas of excessive synchronization at seizure onset  
54 (Bancaud et al., 1970). Complete removal of this zone is crucial for achieving favorable surgical  
55 outcomes in cases of drug-resistant focal epilepsy (Jehi, 2018). Intracranial EEG (iEEG) offers the  
56 highest accuracy for localizing EZ (Jin, So, & Wang, 2016). However, the ictal patterns observed on  
57 iEEG exhibit significant heterogeneity in terms of onset morphology, evolution, and propagation,  
58 suggesting a complex, highly dynamic, and individualized nature of the ictal network (Devinsky et al.,  
59 2018). The interpretation of these patterns primarily relies on visual inspection. Among individuals who  
60 undergo iEEG evaluation followed by resective or other destructive surgery, approximately 50-70%  
61 achieves prolonged seizure freedom (He et al., 2022; Sivaraju et al., 2022), which is still considered  
62 unsatisfactory.

63 Several quantitative EEG methods have been developed to improve the delineation of EZ,  
64 complementing the traditional visual inspection of ictal iEEG (Frauscher, 2020). Most of these studies  
65 utilize fast activity (FA, usually > 30 Hz), on its own or combined with other features (Bartolomei,  
66 Chauvel, & Wendling, 2008; David et al., 2011; Gnatkovsky et al., 2014; Gnatkovsky et al., 2011; Hu et  
67 al., 2023; Wetjen et al., 2009; Wilke, Worrell, & He, 2011). For example, the epileptogenic index or  
68 epileptogenicity mapping, which assesses alterations in the energy ratio between fast and slow activity

---

69 on stereo-EEG (SEEG) signals occurring at the early onset of a seizure, provides a quantitative  
70 measurement for identifying EZ (Bartolomei et al., 2008; David et al., 2011). On the other hand, recent  
71 studies showed that the spectral structure of the ictal FA is as important as its power (Di Giacomo et al.,  
72 2024; Grinenko et al., 2018). For example, the term “ictal chirp” refers to a narrow band of high-power  
73 FA (> 80 Hz) on a time-frequency map (TFM) with decremental frequency over 5-10 s. This pattern is  
74 common and might help localize EZ in focal epilepsy (Di Giacomo et al., 2024; Schiff et al., 2000).  
75 Grinenko et al. proposed the concept of EEG fingerprints as ictal markers for identifying the EZ  
76 (Grinenko et al., 2018; Li et al., 2020). They discovered that ictal FA comprises multiple narrow bands  
77 rather than broad-band activity. However, these methods are less effective for slower EEG seizure  
78 onset patterns (SOP), which account for 20-30% of the common onset patterns observed on iEEG  
79 (Balatskaya et al., 2020; Lagarde et al., 2019; Singh, Sandy, & Wiebe, 2015). The spectral properties of  
80 ictal EEG, relevant to various SOPs, need further investigation to improve the accuracy of EZ  
81 localization.

82 In this study, we conducted a comprehensive analysis of the spectral properties of ictal iEEG in focal  
83 epilepsy, aiming to uncover potentially useful characteristics for EZ localization. We identified a unique  
84 and common spectral structure, referred to as the “harmonic pattern” (H pattern), which is  
85 characterized by multiple equidistant, high-density bands with varying frequencies over time (Fig. 1).  
86 The H pattern is commonly observed in ictal EEG recordings from both experimental models of  
87 epilepsy as well as epileptic patients (Lévesque, Herrington, Hamidi, & Avoli, 2016; Lévesque, Salami,  
88 Gotman, & Avoli, 2012; Schiff et al., 2000). However, it has not been systematically studied. Notably,  
89 the presence of harmonics as a spectral feature of EEG or local field potential (LFP) often indicates that

90 neural oscillations are nonsinusoidal and possibly carry overlooked, nonlinear components that are  
91 indicative of neural communication patterns (S. R. Cole & Voytek, 2017). Importantly, the nonlinear  
92 nature of the brain has long been recognized as fundamental to large-scale integration among local  
93 neurons, facilitating rapid neuronal organization that supports behavior (Sheremet, Burke, & Maurer,  
94 2016). Understanding and quantifying brain nonlinearity is essential for translating brain dynamics into  
95 behavior (Buzsa'ki, 2006; Sheremet et al., 2016). Therefore, it is necessary to further investigate  
96 whether harmonics can reveal the nonlinear nature of the ictal network.

97 To better clarify the clinical relevance of the H pattern, we examined the characteristics of the initial H  
98 pattern and its clinical significance in a cohort of individuals with focal epilepsy who underwent iEEG  
99 evaluation. Our findings indicate that the H pattern encapsulates clinical relevance for EZ localization  
100 as well as seizure propagation. Moreover, we delved into the signal properties of the H pattern to  
101 uncover its potential generation mechanisms using bispectral analysis, a type of higher-order spectral  
102 analysis.

## 103 **Results**

### 104 **Patients and iEEG evaluation**

105 We analyzed iEEG data from all patients who underwent iEEG evaluation between January 2014 and  
106 April 2021 ( $n = 80$ ). Three patients were excluded due to insufficient clinical and ictal EEG information,  
107 and another seven were excluded because their seizure onset origins could not be localized. In the end,  
108 data from 70 patients were available. To investigate the association between the H pattern and seizure  
109 onset patterns (SOP), the SOPs of all seizures were classified into six types (Fig. 1A):

110 Pattern 1, 36 cases with preictal spikes/sharps/polyspikes following fast activity > 14 Hz;

111 (a) Pattern 1.1: low-voltage fast activity (LVFA), amplitude < 30  $\mu$ V;

112 (b) Pattern 1.2: high-voltage fast activity (HVFA), amplitude  $\geq$  30  $\mu$ V.

113 Pattern 2, 11 cases with slow wave/DC shift followed by LVFA;

114 Pattern 3, 12 cases with spikes activity;

115 Pattern 4, seven cases with LVFA;

116 Pattern 5, three cases with beta activity;

117 Pattern 6, one case with delta-brush.

118 After a follow-up period of  $35.5 \pm 21.3$  months, 48 patients (68.6%) achieved seizure freedom.

119 We reviewed TFM during the ictal periods for the 70 patients. Of these, 57 patients presented with at

120 least one H pattern, while the remaining 13 patients did not show any discernable H pattern.

121 Importantly, the routine visual inspection was unable to differentiate the EEG segments harboring the H

122 patterns from those without, in the absence of TFM. The H pattern could occur at different stages of the

123 ictal phase, and their ictal SOPs could be all patterns except delta-brush (Fig. 1A-C). No difference was

124 found between the H pattern and non-H pattern groups in terms of SOP ( $P = 0.095$ , Fisher exact test),

125 lobar origin ( $P = 0.475$ , Fisher exact test), presence of MRI lesion (85.9 % vs. 76.9 %,  $P = 0.416$ , Fisher

126 exact test) or seizure freedom (68.4 % vs. 69.2 %,  $P = 1.000$ , Fisher exact test). The most common

127 pathological finding in both groups was focal cortical dysplasia II (FCD II) (49.1 % vs. 38.5 %, Fisher

---

128 exact test). In the end, 57 patients (81.4%) were included in the subsequent analysis of the H pattern  
129 (Fig. S1). The EZ fingerprint, as defined by Grinenko et al's methods, was observed in 25 out of the 70  
130 patients (35.7%).

131 Among the 57 patients who exhibited H pattern (Table 1), there were 31 males and 26 females. The  
132 mean age of epilepsy onset was  $10.4 \pm 8.5$  years, while the mean age at the time of surgery was  $23.6 \pm$   
133  $12.3$  years. There were 49 patients (85.9 %) who had identified lesions on MRI. The most frequent  
134 seizure origins were the frontal and temporal lobes, with FCD II being the most prevalent pathological  
135 finding (49.1%). At the final follow-up, 39 patients (68.4%) achieved seizure freedom. No differences in  
136 various features were observed between the seizure-free (SF) and not seizure-free (NSF) groups,  
137 except for pathological findings, in which significant differences were noted between FCD II and  
138 gliosis/nonspecific findings.

### 139 **Classification of H pattern**

140 The initial H pattern emerged at  $18.1 \pm 20.5$  s after the ictal EEG onset. The onset time was not limited  
141 to the early stage of seizure evolution but occasionally extended to the late stage of seizures (Fig. 1C).  
142 The H patterns were specifically embedded in two types of EEG segments: fast activity  $> 25$  Hz and  
143 irregular polyspikes  $> 5$  Hz. Consequently, H patterns were classified into: FA-H pattern and PS-H  
144 pattern (Fig. 2A). The proportions of the initial H patterns observed were similar, with 30 out of 57  
145 patients exhibiting the FA-H pattern and 27 out of 57 showing the PS-H pattern. The FA-H pattern was  
146 found to have a lower number of bands ( $Z = -2.75$ ,  $P = 0.006$ , nonparametric Mann-Whitney U test) and  
147 a higher frequency interval ( $Z = -4.52$ ,  $P < 0.0001$ , nonparametric Mann-Whitney U test) compared to



---

148 the PS-H pattern. In the FA-H pattern, both the start time (time zero, EEG onset time;  $Z = -2.85$ ,  $P =$   
149  $0.004$ , nonparametric Mann-Whitney U test) and the end time ( $Z = -2.43$ ,  $P = 0.015$ , nonparametric  
150 Mann-Whitney U test) occurred earlier than those in the PS-H pattern. Additionally, the minimal  
151 frequency ( $Z = -5.14$ ,  $P < 0.0001$ , nonparametric Mann-Whitney U test) and maximal frequency ( $Z =$   
152  $-2.30$ ,  $P = 0.021$ , nonparametric Mann-Whitney U test) were higher (Fig. 2B). In all H patterns, the  
153 frequencies of the band varied over time, exhibiting upwards, downwards, or were bell-shaped before  
154 eventually disappearing.

### 155 **Spatial distribution of H pattern and surgical outcome**

156 The H pattern commonly occurred in the seizure onset zone (SOZ), early propagation zone (PZ), and  
157 sometimes in other zones (OZ) at very close time points, displaying nearly the same frequency interval,  
158 even when these regions were remotely separated (Fig. 3A-C). The H pattern' end time and  
159 minimal/maximal frequencies did not vary across regions. Occasionally, the H pattern extended to the  
160 ipsilateral thalamus, appearing simultaneously with cortical regions and demonstrating the same  
161 frequency interval (Fig. S2).

162 The proportion of contacts displaying the H pattern in each region decreased in the order from SOZ, PZ  
163 to OZ ( $H(2) = 57.16$ , SOZ vs PZ,  $P < 0.001$ ; SOZ vs OZ,  $P < 0.001$ ; PZ vs OZ,  $P = 0.004$ ,  
164 nonparametric Kruskal-Wallis tests, after Bonferroni correction). Likewise, the number of bands  
165 exhibited a similar decreasing trend in each respective zone ( $H(2) = 32.69$ , SOZ vs PZ,  $P = 0.014$ ;  
166 SOZ vs OZ,  $P < 0.001$ ; PZ vs OZ,  $P = 0.012$ , nonparametric Kruskal-Wallis tests, after Bonferroni  
167 correction, Fig. 3C).

---

168 The H pattern in most SOZ showed the highest number of bands (Fig. 3C). To pinpoint H pattern  
169 regions that may indicate epileptogenicity, we defined the dominant-H pattern (*dH* pattern) regions by  
170 using Q3 as a threshold in each patient (see Methods). In the follow-up study, we compared the  
171 resection ratios of SOZ, the H pattern, the *dH* pattern, and non-*dH* pattern channels in the SF and NSF  
172 groups. The results showed that the patients in the SF group had a significantly larger resection  
173 proportion of areas expressing the *dH* pattern compared to those in the NSF group (1.00 (0) vs. 1.00  
174 (0.56),  $Z = -3.29$ ,  $P = 0.003$ , nonparametric Mann-Whitney U test, after Bonferroni correction). In  
175 contrast, no such differences were found for the SOZ, the H pattern, or the non-*dH* pattern (Fig. 3D).  
176 On multivariate analysis, after adjusting for potential confounders of pathology, a complete resection of  
177 areas expressing the *dH* pattern was significantly associated with a higher chance of seizure freedom  
178 (Fig. 3E).

### 179 **Nonlinear analysis of H pattern**

180 The clinical implications of the H pattern have been established in the above findings. To further  
181 investigate the mechanism behind its generation, we analyzed the signal properties. Harmonic  
182 phenomena are typically associated with nonlinear effects, but linear effects can also contribute, as  
183 both can produce equidistant frequency intervals in the spectral domain (Fig. 4A). However, nonlinear  
184 effects uniquely create frequency coupling, which can be detected through bispectral analysis (Fig.  
185 4B-C). Our bispectral analysis of patients exhibiting the H pattern revealed that it is predominantly due  
186 to nonlinear effects. Additionally, the *dH* pattern exhibited stronger nonlinear effects compared to the

---

187 non-*dH* pattern (0.32 (0.94) vs 0.12 (0.28),  $Z = -4.21$ ,  $P < 0.0001$ , nonparametric Mann-Whitney) (Fig.  
188 4*D-F*).

189 Nonlinearity, extending beyond spectral domain features, was evident in the time domain through  
190 waveform distortions, marked by the presence of skewness and asymmetry (Fig. 4*G-H*). Specifically,  
191 skewness refers to the asymmetry of the wave along the horizontal axis, such as sharp narrow peak  
192 (trough) and broad shallow trough (peak); while asymmetry denotes the uneven distribution along the  
193 vertical axis, such as sawtooth waves (short rise (decay) and long decay (rise)) (Fig. 4*H*). In the  
194 following sections, we will carefully investigate the waveform characteristics of the EEG signals  
195 corresponding to the H pattern through four representative cases.

#### 196 ***Stronger skewness underlying dH pattern***

197 We initially presented a case involving the FA-H pattern (Fig. 5). The *dH* pattern exhibited more bands  
198 compared to the non-*dH* pattern (Fig. 5*A*), which was attributed to sharper troughs in the EEG signals.  
199 This was demonstrated by fitting peaks and troughs with sinusoidal waves individually (Fig. 5*C*). In the  
200 *dH* pattern, the trough durations ( $T_{\text{trough}}$ ) were consistently lower than the peak durations ( $T_{\text{peak}}$ ). The  
201 consistency of  $T_{\text{trough}}$  contributed to a more stereotyped waveform, highlighting its distinctive  
202 morphological consistency (Fig. 5*C*).

203 The nonlinearity of harmonics was assessed through bispectral analysis (Fig. 5*B*). This analysis  
204 showed that the *dH* pattern exhibited stronger bicoherence and skewness (indicative of sharper  
205 troughs), whereas these features were less pronounced in the non-*dH* pattern. To further demonstrate  
206 the role of sharper troughs in generating the H pattern, we constructed a simple waveform with sharper

---

207 troughs, which exhibited pronounced harmonics. The corresponding bispectral analysis showed strong  
208 bicoherence and skewness, confirming that sharp troughs contribute to the generation of the H pattern  
209 (Fig. S3A-C, left).

#### 210 ***Stronger asymmetry underlying dH pattern***

211 In the second case with the FA-H pattern, the dH pattern was generated by asymmetric waveforms.  
212 Here, the rise durations ( $T_{\text{rise}}$ ) were consistently longer than the decay durations ( $T_{\text{decay}}$ ) (Fig. 5 D, F).  
213 Both  $T_{\text{rise}}$  and  $T_{\text{decay}}$  remained constant, resulting in a relatively stereotyped EEG waveform for the dH  
214 pattern. The harmonic nonlinearity was also confirmed by its bispectral characteristics, which showed  
215 stronger bicoherence and asymmetry in the dH pattern than the non-dH pattern (Fig. 5E). Furthermore,  
216 we designed a sloping waveform characterized by longer  $T_{\text{rise}}$  compared to  $T_{\text{decay}}$ , with its TFM  
217 exhibiting strong harmonics. The bispectral analysis has strong bicoherence and asymmetry. This  
218 observation further validated the role of asymmetric waveforms in generating the H pattern (Fig. S3A-C,  
219 right).

#### 220 ***Stronger skewness and asymmetry underlying dH pattern***

221 The waveform associated with the H pattern sometimes concurrently manifested skewness and  
222 asymmetry. One more case with an FA-H pattern was presented in Fig. S4. The case revealed that the  
223 dH pattern was featured by sharp troughs and asymmetry (short rise, long decay) of waveforms (Fig.  
224 S4 A, C-D). The distorted waveforms consistently appeared for the dH pattern, causing to a stereotype  
225 morphology of the EEG segment. Furthermore, the harmonic nonlinearity was corroborated by the

226 bispectral characteristics, where the  $dH$  pattern exhibited stronger bicoherence, skewness, and  
227 asymmetry compared to the non- $dH$  pattern (Fig. S4B).

228 We concluded by presenting a case with the PS-H pattern (Fig. 5S). This pattern was characterized by  
229 both sharp peaks and asymmetric (short rise, long decay) waveforms (Fig. 5S A, C-D). The highly  
230 stereotyped waveform of the  $dH$  pattern was attributed to its consistently sharp peaks and asymmetric  
231 pattern. Similarly, we found that the  $dH$  pattern exhibited stronger bicoherence, skewness, and  
232 asymmetry compared to the non- $dH$  pattern, as reviewed (Fig. S5B).

233 In summary, in our study the high-order spectral analysis revealed the existence of oscillatory  
234 interactions in the H pattern, suggesting a nonlinear effect. In the time domain, the H pattern was the  
235 spectral signature of the shape change of EEG waveforms.

### 236 **Propagation analysis of H pattern**

237 Focal seizures often originate from a localized region and subsequently propagate to other brain areas.  
238 Understanding this propagation is crucial for understanding seizure dynamics. Both  $dH$  and non- $dH$   
239 patterns typically share the same fundamental frequency, indicating synchronized oscillations between  
240 these regions and suggesting an underlying connection.

241 Nonlinear features of EEG signals can be influenced during the spatiotemporal propagation between  
242 regions. The stronger nonlinear effects observed in the  $dH$  pattern compared to the non- $dH$  pattern  
243 may reflect the process of spatiotemporal propagation from the  $dH$  to the non- $dH$  pattern. To test this  
244 hypothesis, we used transfer functions to evaluate the relationship between the  $dH$  and non- $dH$

---

245 patterns. The results revealed that the peak FitPercent was higher when estimating propagation from  
246 the *dH* pattern to the non-*dH* pattern, compared to the reverse direction (42.44 (34.44) vs 22.68 (28.72),  
247  $Z = -6.35$ ,  $P < 0.0001$ , Wilcoxon signed-rank) (Fig. 6). This suggests that the *dH* pattern is more likely to  
248 propagate to the non-*dH* pattern, while propagation in the opposite direction occurs less frequently.

## 249 **Discussion**

250 As a distinct spectral feature of ictal iEEG signals, the H pattern was commonly observed in most  
251 patients with various EEG onset patterns, whether during early or late seizure propagation (Weiss et al.,  
252 2013). Moreover, despite substantial variations in the morphology and features of the H pattern across  
253 individuals, each patient exhibited a highly uniform pattern for habitual seizures. Its analysis not only  
254 provides crucial insights into the dynamics of ictal neural activity but also offers valuable information  
255 about the EZ. Our important findings include: (1) The dominance of H pattern is a promising and  
256 universal ictal marker for identifying the EZ; (2) the H patterns are, in fact, the spectral signature of  
257 waveform skewness or/and asymmetry, with the dominance of H pattern reflecting a stronger  
258 nonlinearity of ictal oscillations, which correlates with higher epileptogenicity (Fig.7); (3) the H patterns  
259 can occur simultaneously in different cortical regions with consistent fundamental frequencies,  
260 suggesting they represent a pivotal stage of inter-regional synchronization during seizure propagation.

261 Our findings not only enhance the understanding of the spectral features of ictal EEG but also  
262 underscore its significance in defining the EZ. Some of the FA-H patterns observed in our study  
263 resemble or may overlap with narrow band fast activity as defined in EEG fingerprint studies or *Chirp*  
264 studies (Grinenko et al., 2018; Schiff et al., 2000). Notably, the H pattern was also observed during later

---

265 stages of seizure propagation for PS-H patterns, sometimes in the seizures that did not have initial fast  
266 activity. This suggests the potential for expanding the time window for defining the EZ using ictal EEG.  
267 In our study, the sensitivity for detecting EEG fingerprints was low, while the ictal H pattern was  
268 prevalent. The FA-H pattern and PS-H pattern manifested during different stages of seizure evolution.  
269 Compelling evidence indicates that the presence of fast activity is supported by a significant activation  
270 of inhibitory interneurons, combined with a transient shutdown of excitatory cells (Fujiwara-Tsukamoto  
271 et al., 2010; Gnatkovsky, Librizzi, Trombin, & de Curtis, 2008; Köhling, Vreugdenhil, Bracci, & Jefferys,  
272 2000; Lasztóczy, Nyitrai, Héja, & Kardos, 2009; Velazquez & Carlen, 1999; Ziburkus, Cressman,  
273 Barreto, & Schiff, 2006). Therefore, the FA-H pattern may be predominantly influenced by inhibitory  
274 interneurons. On the other hand, irregular spiking usually occurs at the later stage of seizures and is  
275 linked to a decrease in inhibitory interneuron firing and an increase in excitatory neuron interactions (de  
276 Curtis & Gnatkovsky, 2009). The PS-H pattern may be supported by a more substantial involvement of  
277 excitatory neuron firing.

278 Harmonic phenomena have a well-established presence in EEG or local field potential (LFP) signals,  
279 potentially linked to specific brain functional states (Coelli et al., 2019; Marceglia et al., 2006;  
280 Müller-Putz, Scherer, Brauneis, & Pfurtscheller, 2005). For instance, during nonrapid eye movement  
281 (NREM) sleep, sleep spindles exhibit harmonic phenomena, with parameters changing in accordance  
282 with sleep stages, reflecting functional alterations in the thalamocortical reverberant network  
283 (Abey Suriya, Rennie, Robinson, & Kim, 2014). Sheremet et al. studied the LFP recorded in the rat  
284 hippocampus and found harmonics of theta activity, together with the corresponding waveforms,  
285 changed with the movement speed of patients, harmonic phenomena have not received adequate

---

286 attention in the field of epilepsy (Lévesque et al., 2016; Lévesque et al., 2012; Schiff et al., 2000). Our  
287 finding unveils harmonic features harbor localizing information about the neural dynamics of seizures,  
288 enriching our knowledge of the ictal network and emphasizing the importance of considering the  
289 nonlinear nature of the ictal network.

290 Neural oscillations, as a prominent feature in brain recordings, are crucial for understanding both  
291 pathological conditions and physiological behaviors (S. Cole & Voytek, 2019; Samarasinghe et al.,  
292 2021). Traditionally, these oscillations are analyzed by linear methods, which may overlook the  
293 complexity of brain activity (Buzsa'ki, 2006). Spectral analysis often involves filtering signals into  
294 specific frequency bands of interest, treating EEG signals as if they were simple sine waves, and  
295 applying smoothing techniques. This approach can obscure or eliminate subtle waveform features.

296 Increasing evidence suggests that neural oscillations are frequently non-sinusoidal and contain  
297 significant nonlinear information (Buzsa'ki, 2006; Sheremet et al., 2016). In this study, we  
298 demonstrated that the nonlinearity of ictal signals, as confirmed by high-order spectral analysis and  
299 corresponding to waveform skewness and/or asymmetry, can be quantified and measured. The  
300 nonlinearity was more pronounced in the  $dH$  pattern compared to the non- $dH$  pattern. Some studies  
301 showed nonlinear analysis of ictal EEG using sophisticated algorithms could provide seizure  
302 localization information (Andrzejak, Schindler, & Rummel, 2012; Hu et al., 2023). However, the  
303 nonlinear feature of the H pattern can be directly visualized in both the time and spectral domains,  
304 offering significant practical application value. In addition, our findings highlight the importance of  
305 waveform analysis, which can complement linear methods of EZ localization based on EEG frequency  
306 and power.



307 Many studies suggest that non-sinusoidal waveforms in EEG can reflect the degree of correlated  
308 activity within neuronal populations. For example, sharp transients observed in spike-wave discharges  
309 are indicative of synchronous neuronal firing (Slaght et al., 2004). Recent research has shown that  
310 increased neuronal synchronization results in highly asymmetric waveforms, while reduced  
311 synchronization leads to more sinusoidal shapes (Garcia-Rosales, Schaworonkow, & Hechavarria,  
312 2024). Additionally, a stronger nonlinear component in the EEG waveform often indicates greater  
313 neuronal synchronization in the cerebral cortex (Stam, 2005). Our results show that the *dH* pattern  
314 exhibits greater skewness and/or asymmetry in its waveforms compared to the non-*dH* pattern, with a  
315 more stereotyped waveform. This consistency suggests the repeated occurrence of the same  
316 oscillatory pattern. These findings imply that the H pattern may serve as an EEG signature of rhythmic  
317 and synchronized neuronal firing within local epileptic tissues (Fig. 7). The diverse waveforms observed  
318 during this stage could reflect various underlying neuronal mechanisms. Further research is imperative  
319 to elucidate the cellular and dynamic processes responsible for the diverse waveforms associated with  
320 the H pattern.

321 The H pattern represents a distinctive stage in seizure propagation. Our findings indicate a higher  
322 likelihood that signals in the *dH* pattern propagate to the non-*dH* pattern, aligning with the gradient of  
323 epileptogenicity across brain regions. The H pattern visually represents this unique stage of  
324 inter-regional synchronization, as evidenced by the consistent fundamental frequencies observed  
325 across regions during the occurrence of H pattern. This synchronization may be a characteristic of  
326 seizure propagation. Notably, this synchronization can also extend to distant areas, including  
327 contralateral cortical regions and even the ipsilateral thalamus.

328 The study has several limitations. First, simultaneous unit recording was not performed, which limits the  
329 exploration of the cellular mechanisms underlying the H pattern. Secondly, due to the heterogeneous  
330 morphology of H patterns across subjects and the current lack of automated identification, their visual  
331 recognition was inherently subjective to personal experience. Moreover, multiple H patterns sometimes  
332 occur in the same seizure, but only the first occurrence was analyzed in this study. Further investigation  
333 is warranted for cases where H patterns appear consecutively. Thirdly, using a threshold (Q3) to define  
334 the dominant H pattern may not accurately capture individual variability. Future studies could benefit  
335 from adopting a patient-specific approach to defining the dominant H pattern.

## 336 **Conclusion**

337 Our study defines a common and distinctive ictal spectral feature, termed the H pattern. Its dominance  
338 signifies specific waveforms and highlights the nonlinearity of ictal EEG signals. This feature may be  
339 associated with rhythm and synchronization of neuronal firing in local epileptic tissues. The H pattern  
340 imparts unique information about ictal neural dynamics as well as offers novel insights into localizing  
341 the EZ. Our data also provides evidence supporting an elongated time window for measuring EZ using  
342 quantitative EEG.

## 343 **Methods**

### 344 **Patients and intracranial electroencephalography evaluation**

345 We conducted a review of consecutive patients with drug-resistant focal epilepsy who underwent  
346 intracranial electroencephalography (iEEG) evaluation followed by resective surgery at our epilepsy

347 center between January 2014 and April 2021. All patients were followed for more than two years after  
348 surgery. A comprehensive assessment was undertaken, encompassing a detailed medical history,  
349 neuropsychological testing, neuroimaging examination, and scalp video-EEG recordings. This study  
350 was approved by the Medical Ethics Committee of the Second Affiliated Hospital, Zhejiang University  
351 School of Medicine (Study No. 2020-910). iEEG was performed using intracerebral multiple-contacts  
352 electrodes, with contacts that were 2 mm in length, 0.8 mm in diameter, and 1.5 mm apart. iEEG signal  
353 was recorded by EEG systems with 256 channels (Nihon Kohden) or 128 channels (Xltek, Natus,  
354 Ontario, Canada) at a sampling rate of 1000 or 2000 Hz. Pre-implantation MRI and post-implantation  
355 computed tomography (CT) were co-registered to locate each contact anatomically along each  
356 electrode trajectory.

357 EEG data were reviewed on bipolar montage. Only contacts within the grey matter were selected. SOP  
358 was assessed on the earliest involved electrodes. As previously described (Hu et al., 2023; M. Y. Wang  
359 et al., 2017; S. Wang et al., 2017), SOZ was defined as the area unequivocally showing the earliest  
360 change on iEEG, and PZ as the area showing a rapid spread of ictal activity within 3-5 seconds of  
361 seizure onset. Other brain regions were classified as OZ. SOP, SOZ, PZ, and OZ were independently  
362 defined by two clinical neurophysiologists. In the event of inconsistencies, discussions would be held  
363 with a third epileptologist to reach a consensus.

364 Surgical plans were developed by a multidisciplinary team, independent of the parameters considered  
365 in this study. After surgery, preoperative MRI and postoperative CT were integrated to identify precise  
366 borders of the resection. The electrode contacts located on resection margins or in disconnected

---

367 tissues were defined as removed contacts. Surgical outcomes were assessed at the most recent  
368 follow-up based on Engel's classification. Surgical outcomes were classified as Engel Ia (seizure-free,  
369 SF) and > Engel Ia (not seizure-free, NSF).

## 370 **Quantitative EEG analysis**

### 371 ***Identification of Harmonic patterns***

372 For each seizure, a 110-second window of iEEG data was extracted: 10 s before and 100 s after the  
373 seizure onset, and another 110 s-epoch of iEEG data was also collected (> 2 min before the seizure  
374 onset) as a statistical baseline. Morlet wavelet transform analysis was used to generate TFM and  
375 subsequently validated using the multitaper method. Both methods used linear spacing in the  
376 frequency range of 1 to 300 Hz, with an interval of 1 Hz. The TFM of seizure was normalized by the  
377 baseline data, where the power at each frequency was divided by the corresponding baseline power  
378 (for methodological details, see Grinenko et al., 2018) (Grinenko et al., 2018).

379 The features of the H pattern are characterized by its frequency distribution, which is similar to a  
380 harmonic structure composed of multiple equidistant, high-density narrow bands with varying  
381 frequencies over time (Fig. 1C). Each frequency band (referring to the shape of the frequency  
382 distribution, rather than the range of frequencies in this study) of H pattern, ranging from low to high,  
383 were denoted as the first ( $f_{1st}$ ), second ( $f_{2nd}$ ), third frequency band ( $f_{3rd}$ ), and so forth. At a specific time  
384 point, the consistent difference between adjacent frequency bands is defined as the frequency interval.  
385 This interval is equivalent to the fundamental frequency ( $f$ ), which commonly denotes the frequency of  
386 the lowest frequency band. The frequencies of narrow bands fall around the multiples of the

---

387 fundamental frequency. The minimal and maximal frequencies were determined at the peaks of the first  
388 and last frequency bands, respectively. The parameters of the H pattern, including minimal/maximal  
389 frequency and start/end time, were extracted using Brainstorm software. For one patient, the H pattern  
390 was usually consistent in habitual seizures (Jouny, Adamolekun, Franaszczuk, & Bergey, 2007), and  
391 we randomly selected one seizure for analysis. In cases where several H patterns occurred  
392 consecutively within a single seizure, only the initial pattern was chosen for analysis.

393 To further identify channels exhibiting the dominant H pattern, a threshold of Q3 was set, represented  
394 as the upper quartile (75th percentile of data distribution) of the total number of bands:

$$Q3 = (n + 1) \times 3/4$$

395 where n is the highest band number in each individual. Any channel with a band number of H pattern  
396 exceeding this threshold would be designated as a “dominant-H pattern” (dH pattern) channel;  
397 otherwise it was labeled as a “non-dominant H pattern” (non-dH pattern) channel.

398 The correlation between removal of the region expressing SOZ, the H pattern, the dH pattern or non-  
399 dH pattern and the postoperative outcome was analyzed. Resection ratio was calculated as the  
400 number of channels with the events included within the resection over the total number of channels  
401 where the events were observed (S. Wang et al., 2017). A value of 1 indicates complete removal of the  
402 events, while a value of 0 represents complete non-removal.

403 ***Nonlinear analysis of H pattern***

404 From a physical standpoint, harmonics can originate from either linear or nonlinear phenomena, each  
405 exhibiting its intrinsic characteristics. In a linear system, solutions can be superposed to construct new  
406 solutions, forming a linear space. Sinusoids make up the Fourier basis of this solution space, where the  
407 general solution is a superposition of sinusoids with varying amplitudes, fully defined by the amplitude  
408 distribution. The geometry of a linear system's solution space is straightforward: any point within the  
409 space spanned by the Fourier basis represents a solution, and the general solution is characterized by  
410 its amplitude projections on this basis. Thus, harmonics are statistically independent and their presence  
411 does not modify the statistics of the process.

412 Conversely, in nonlinear systems, solutions cannot be simply added to form new ones, rendering them  
413 more complex. Decomposing such systems on a linear basis results in a set of equations that describe  
414 the evolution of amplitudes through their mutual interactions. The solution space's geometry becomes  
415 intricate, with phase correlations influencing the solution shape, such as the development of time series  
416 asymmetries. Thus, the presence of harmonics might be accompanied by phase correlations that have  
417 significant and fundamental effects on the shape and statistics of the process. The spectral density  
418 alone lacks details about phases, their correlations, and the nonlinearity of the process. We can check  
419 the phase correlation between spectral components by bispectrum analysis, the basic formula is as  
420 follows:

$$B_{n,m} = B(f_n, f_m) = E[G_n G_m G_{m+n}^*]$$

---

421 Here,  $f_n$  and  $f_m$  are two frequencies,  $G_n$  is the corresponding complex Fourier coefficient using the  
422 discrete Fourier transform (DFT), and \* denotes the complex conjugate. The bispectrum  $B_{n,m}$   
423 represents the phase correlation between Fourier modes with frequencies  $f_n, f_m$  and  $f_{n+m} = f_n + f_m$ .  
424 To eliminate the distortion induced by the variance distribution, the bispectrum can be normalized as  
425 follows:

$$426 \quad b_{n,m} = \frac{B_{n,m}}{(\mathbb{E}[|G_n G_m|^2] \mathbb{E}[|G_{n+m}|^2])^{1/2}}.$$

427 The squared modulus and phase of the normalized bispectrum  $b_{n,m}$  are termed bicoherence and  
428 biphase, respectively (Sheremet et al., 2016).

429 The bispectrum, and by extension the normalized bispectrum, displays well-established symmetries in  
430 the  $(f_n, f_m)$  plane, as illustrated in Fig. 4B. The first diagonal acts as a symmetry axis, making the data  
431 on either side equivalent (Rosenblatt, 1965). The red triangle highlights the nonredundant bispectral  
432 information, which is crucial for interpreting bispectral distributions. At any point  $(f_n, f_m)$ , the value of the  
433 bispectrum  $B(f_n, f_m)$  represents the phase correlation between the Fourier modes with frequencies  $f_n$ ,  
434  $f_m$  and  $f_{n+m}$ . For a linear system, where Fourier coefficients are mutually independent, the bispectrum  
435 is statistically zero. In nonlinear systems, however, the bispectrum will exhibit peaks at triads that are  
436 phase correlated, reflecting the degree of two-wave coupling (Fig. 4C).

437 In the spectral domain, nonlinearity is expressed as the development of a chain of harmonics  
438 statistically phase coupled to fundamental frequency. In the time domain, it is expressed as the  
439 development of skewness and asymmetry in the waveform (Fig. 4H). To elaborate, a wave comprises

---

440 one or more periods, featuring peaks, troughs, rise and decay. Skewness indicates horizontal  
441 asymmetry, where the duration of peaks or troughs is not half the period. Asymmetry points to vertical  
442 asymmetry, with rise or decay times also not being half the period. The normalized bispectrum's real  
443 and imaginary parts encapsulate the "frequency distribution" of these waveform distortions. We will  
444 refer to the real and imaginary parts of the normalized bispectrum as the distributions of skewness and  
445 asymmetry, defined as follows:

446 
$$\xi_{n,m} = \text{Re}\{b_{n,m}\}; A_{n,m} = \text{Im}\{b_{n,m}\}$$

447 Here,  $\text{Re}\{z\}$  and  $\text{Im}\{z\}$  denote the real and imaginary parts of the complex number  $z$ , respectively. The  
448 sign of  $\xi$  and  $A$  ( $\pm$ ) indicates the direction of the skewness or asymmetry.

449 Furthermore, waveform original iEEG signals were carefully analyzed. Initially, signals were detrended  
450 using the smoothing method 'loess' in MATLAB, which adjusted the wave's oscillations around a  
451 zero-valued baseline, thereby distinguishing troughs from peaks. Each trough and peak was  
452 subsequently fitted with a sinusoidal wave of a single frequency to identify the waveforms of EEG  
453 signals.

454 EEG signals were processed by de-meaning, linear detrending, and dividing into 50% overlapping  
455 segments of approximately 0.5-second windows ( $2^{10}$ -point windows at a sampling rate  $f_s = 2000$  Hz),  
456 achieving a frequency resolution of approximately  $\Delta f = 2$  Hz. The total intervals were around 7  
457 seconds, yielding approximately 28 degrees of freedom (DOF). For the normalization  $b_{n,m}$ , the  
458 probability density function was approximated using the noncentral  $\chi^2$  distribution (S. G. Elgar S, 1989;  
459 Rosenblatt, 1965). A confidence level distinguishes linear from nonlinear stochastic processes. With



---

460 DOF = 28, zero-mean bicoherence, significant in this context, is  $|b| < \sqrt{\frac{6}{DOF}} \approx 0.46$  for a 95%  
461 confidence level (G. R. Elgar S, 1985; S. G. Elgar S, 1989). All calculations were implemented in  
462 MATLAB, utilizing its DFT functions. Bispectral estimates were computed using code based on  
463 modified functions from the HOSA toolbox.

#### 464 ***Inferring seizure propagation***

465 We employed transfer functions to estimate the propagation relationship between the *dH* pattern and  
466 non-*dH* pattern. Using 'tfest' in MATLAB, we estimated all possible transfer functions with number of  
467 poles  $np$  and zeros  $nz$  ranging from 0 to 10 with the constraint  $nz \leq np$  and enforced stability of the  
468 system. As discussed in **Nonlinear analysis of H pattern**, power spectrum cannot capture the  
469 nonlinearity, thus we used time domain for estimation.

470 For the propagation from the *dH* pattern to the non-*dH* pattern, the former was set as the input, and the  
471 latter as the fitting target, and *vice versa*. The fitting performance was evaluated by the optimal fitting  
472 percentage (FitPercent) among all possible transfer functions, given as

$$\text{FitPercent} = 100 \left( 1 - \frac{\|y_{\text{measured}} - y_{\text{model}}\|}{\|y_{\text{measured}} - \overline{y_{\text{measured}}}\|} \right)$$

473 Where  $y_{\text{measured}}$  is the target output data,  $\overline{y_{\text{measured}}}$  is its mean, and  $y_{\text{model}}$  is the simulated or  
474 predicted response of the model.  $\|*\|$  indicates the 2-norm of a vector. FitPercent varies between  
475 -Infinity (bad fit) to 100 (perfect fit). If the value is zero, the model performs no better at fitting the target  
476 than a straight line representing the mean of the data. A higher FitPercent indicates that the model's  
477 predicted output closely matches the actual output, signifying superior fitting performance. Therefore, a

478 higher FitPercent value suggests greater confidence that propagation from the  $dH$  pattern to non- $dH$   
479 pattern is occurring, as the model effectively predicts the outputs of both non- $dH$  and  $dH$  patterns.

#### 480 **Statistical analysis**

481 SPSS 24.0 software was used for statistical analysis. All continuous variables were first tested using a  
482 homogeneity test for variance and a test of normality. According to the results, normal variables were  
483 presented as mean  $\pm$  SD; and non-normal variables were reported as medians with interquartile ranges.  
484 Categorical variables were displayed as frequencies. Comparisons between two independent groups  
485 were made using Student's t tests or nonparametric Mann-Whitney U tests, and comparisons among  
486 three independent groups were analyzed with one-way analyses of variance (ANOVAs) or  
487 nonparametric Kruskal-Wallis tests. The two correlation groups using Paired Student's t tests or  
488 Wilcoxon Signed-Rank Test. Pearson's chi-square or Fisher's exact tests were used for categorical  
489 variables. Multivariate logistic regression was used to control for potential confounding factors when  
490 comparing the  $dH$  pattern resection ratio between the two groups. A  $P$  (Bonferroni adjusted for multiple  
491 testing) value  $< 0.05$  was considered statistically significant.

#### 492 **Author Contributions**

493 Conceptualization: S.W., D.-P.Y. Data collection: L.-L.H., L.-Q.Y., H.-Y.Y. Data analysis: L.-L.H., X.-C.L.,  
494 K.X., Y.-M.Z. Validation of analysis: Z.Z., H.-J.J. Supervision: Z.-J.W., Y.-C.W., K.-J.H. Funding  
495 acquisition: S.W., C.C. Writing-manuscript preparation: L.-L.H., D.-P.Y., J.M.Z. Writing-reviewing and  
496 editing: S.W., D.-P.Y., J.-P.Z., M.-P.D., C.Z.

## 497 **Competing Interest Statement**

498 The authors report no competing interests.

## 499 **Data availability**

500 The collected EEG data are used for seizure localization and to inform clinical decisions. The  
501 de-identified dataset supporting the study findings is available upon request from the corresponding  
502 author. For inquiries or to request the source data for the figures, please contact S.W. via e-mail.

## 503 **Code availability**

504 EEG data analyses were performed using the freely available toolbox Brainstorm in combination with  
505 custom Matlab scripts, which are available at: <https://github.com/chenx-epi/H-pattern>.

## 506 **Acknowledgements**

507 This work was supported by the National Natural Science Foundation of China (grant numbers:  
508 82171437, 82471469 and 82301636) and the Natural Science Foundation of Zhejiang Province (grant  
509 no. LD24H090003 and LY24H090004).

## 510 **Supplementary material**

511 Supplementary material is available online.

## 512 **References**

- 
- 513 Abeyesuriya, R. G., Rennie, C. J., Robinson, P. A., & Kim, J. W. (2014). Experimental observation of a  
514 theoretically predicted nonlinear sleep spindle harmonic in human EEG. *Clin Neurophysiol*, *125*(10),  
515 2016-2023. doi:10.1016/j.clinph.2014.01.025
- 516 Andrzejak, R. G., Schindler, K., & Rummel, C. (2012). Nonrandomness, nonlinear dependence, and  
517 nonstationarity of electroencephalographic recordings from epilepsy patients. *Phys Rev E Stat Nonlin*  
518 *Soft Matter Phys*, *86*(4 Pt 2), 046206. doi:10.1103/PhysRevE.86.046206
- 519 Balatskaya, A., Roehri, N., Lagarde, S., Pizzo, F., Medina, S., Wendling, F., . . . Bartolomei, F. (2020).  
520 The "Connectivity Epileptogenicity Index " (cEI), a method for mapping the different seizure onset  
521 patterns in StereoElectroEncephalography recorded seizures. *Clin Neurophysiol*, *131*(8), 1947-1955.  
522 doi:10.1016/j.clinph.2020.05.029
- 523 Bancaud, J., Angelergues, R., Bernouilli, C., Bonis, A., Bordas-Ferrer, M., Bresson, M., . . . Talairach, J.  
524 (1970). Functional stereotaxic exploration (SEEG) of epilepsy. *Electroencephalogr Clin Neurophysiol*,  
525 *28*(1), 85-86.
- 526 Bartolomei, F., Chauvel, P., & Wendling, F. (2008). Epileptogenicity of brain structures in human  
527 temporal lobe epilepsy: a quantified study from intracerebral EEG. *Brain*, *131*(Pt 7), 1818-1830.  
528 doi:10.1093/brain/awn111
- 529 Buzsáki, G. (2006). Rhythms of the brain. *New York: OUP*.

- 
- 530 Coelli, S., Tacchino, G., Visani, E., Panzica, F., Franceschetti, S., & Bianchi, A. M. (2019). Higher order  
531 spectral analysis of scalp EEG activity reveals non-linear behavior during rhythmic visual stimulation. *J*  
532 *Neural Eng*, *16*(5), 056028. doi:10.1088/1741-2552/ab296e
- 533 Cole, S., & Voytek, B. (2019). Cycle-by-cycle analysis of neural oscillations. *J Neurophysiol*, *122*(2),  
534 849-861. doi:10.1152/jn.00273.2019
- 535 Cole, S. R., & Voytek, B. (2017). Brain Oscillations and the Importance of Waveform Shape. *Trends*  
536 *Cogn Sci*, *21*(2), 137-149. doi:10.1016/j.tics.2016.12.008
- 537 David, O., Blauwblomme, T., Job, A. S., Chabardès, S., Hoffmann, D., Minotti, L., & Kahane, P. (2011).  
538 Imaging the seizure onset zone with stereo-electroencephalography. *Brain*, *134*(Pt 10), 2898-2911.  
539 doi:10.1093/brain/awr238
- 540 de Curtis, M., & Gnatkovsky, V. (2009). Reevaluating the mechanisms of focal ictogenesis: The role of  
541 low-voltage fast activity. *Epilepsia*, *50*(12), 2514-2525. doi:10.1111/j.1528-1167.2009.02249.x
- 542 Devinsky, O., Vezzani, A., O'Brien, T. J., Jette, N., Scheffer, I. E., de Curtis, M., & Perucca, P. (2018).  
543 Epilepsy. *Nat Rev Dis Primers*, *4*, 18024. doi:10.1038/nrdp.2018.24
- 544 Di Giacomo, R., Burini, A., Chiarello, D., Pelliccia, V., Deleo, F., Garbelli, R., . . . Gnatkovsky, V.  
545 (2024). Ictal fast activity chirps as markers of the epileptogenic zone. *Epilepsia*, *65*(6), e97-e103.  
546 doi:10.1111/epi.17995
- 547 Elgar S, G. R. (1985). Observations of bispectra of shoaling surface gravity waves. *Journal of Fluid*  
548 *Mechanics*, *161*:425– 448.

- 
- 549 Elgar S, S. G. (1989). Statistics of bicoherence and biphasic. *J Geophys Res Oceans*, *94*:10993–10998.
- 550 Frauscher, B. (2020). Localizing the epileptogenic zone. *Curr Opin Neurol*, *33*(2), 198-206.
- 551 doi:10.1097/wco.0000000000000790
- 552 Fujiwara-Tsukamoto, Y., Isomura, Y., Imanishi, M., Ninomiya, T., Tsukada, M., Yanagawa, Y., . . .
- 553 Takada, M. (2010). Prototypic seizure activity driven by mature hippocampal fast-spiking interneurons.
- 554 *J Neurosci*, *30*(41), 13679-13689. doi:10.1523/jneurosci.1523-10.2010
- 555 Garcia-Rosales, F., Schaworonkow, N., & Hechavarria, J. C. (2024). Oscillatory Waveform Shape and
- 556 Temporal Spike Correlations Differ across Bat Frontal and Auditory Cortex. *J Neurosci*, *44*(10).
- 557 doi:10.1523/JNEUROSCI.1236-23.2023
- 558 Gnatkovsky, V., de Curtis, M., Pastori, C., Cardinale, F., Lo Russo, G., Mai, R., . . . Francione, S. (2014).
- 559 Biomarkers of epileptogenic zone defined by quantified stereo-EEG analysis. *Epilepsia*, *55*(2), 296-305.
- 560 doi:10.1111/epi.12507
- 561 Gnatkovsky, V., Francione, S., Cardinale, F., Mai, R., Tassi, L., Lo Russo, G., & de Curtis, M. (2011).
- 562 Identification of reproducible ictal patterns based on quantified frequency analysis of intracranial EEG
- 563 signals. *Epilepsia*, *52*(3), 477-488. doi:10.1111/j.1528-1167.2010.02931.x
- 564 Gnatkovsky, V., Librizzi, L., Trombin, F., & de Curtis, M. (2008). Fast activity at seizure onset is
- 565 mediated by inhibitory circuits in the entorhinal cortex in vitro. *Ann Neurol*, *64*(6), 674-686.
- 566 doi:10.1002/ana.21519

- 
- 567 Grinenko, O., Li, J., Mosher, J. C., Wang, I. Z., Bulacio, J. C., Gonzalez-Martinez, J., . . . Chauvel, P.  
568 (2018). A fingerprint of the epileptogenic zone in human epilepsies. *Brain*, *141*(1), 117-131.  
569 doi:10.1093/brain/awx306
- 570 He, C., Chen, C., Yang, Y., Hu, L., Jin, B., Ming, W., . . . Wang, S. (2022). Clinical Characteristics and  
571 Prognostic Significance of Subclinical Seizures in Focal Epilepsy: A Retrospective Study. *Neurol Ther*,  
572 *11*(2), 763-779. doi:10.1007/s40120-022-00342-y
- 573 Hu, L., Xiong, K., Ye, L., Yang, Y., Chen, C., Wang, S., . . . Wang, S. (2023). Ictal EEG  
574 desynchronization during low-voltage fast activity for prediction of surgical outcomes in focal epilepsy.  
575 *J Neurosurg*, *139*(1), 238-247. doi:10.3171/2022.11.JNS221469
- 576 Jehi, L. (2018). The Epileptogenic Zone: Concept and Definition. *Epilepsy Curr*, *18*(1), 12-16.  
577 doi:10.5698/1535-7597.18.1.12
- 578 Jin, B., So, N. K., & Wang, S. (2016). Advances of Intracranial Electroencephalography in Localizing  
579 the Epileptogenic Zone. *Neurosci Bull*, *32*(5), 493-500. doi:10.1007/s12264-016-0035-8
- 580 Jouny, C. C., Adamolekun, B., Franaszczuk, P. J., & Bergey, G. K. (2007). Intrinsic ictal dynamics at  
581 the seizure focus: effects of secondary generalization revealed by complexity measures. *Epilepsia*, *48*(2),  
582 297-304. doi:10.1111/j.1528-1167.2006.00963.x
- 583 Köhling, R., Vreugdenhil, M., Bracci, E., & Jefferys, J. G. (2000). Ictal epileptiform activity is  
584 facilitated by hippocampal GABAA receptor-mediated oscillations. *J Neurosci*, *20*(18), 6820-6829.  
585 doi:10.1523/jneurosci.20-18-06820.2000

- 
- 586 Lagarde, S., Buzori, S., Trebuchon, A., Carron, R., Scavarda, D., Milh, M., . . . Bartolomei, F. (2019).  
587 The repertoire of seizure onset patterns in human focal epilepsies: Determinants and prognostic values.  
588 *Epilepsia*, 60(1), 85-95. doi:10.1111/epi.14604
- 589 Lasztóczy, B., Nyitrai, G., Héja, L., & Kardos, J. (2009). Synchronization of GABAergic inputs to CA3  
590 pyramidal cells precedes seizure-like event onset in juvenile rat hippocampal slices. *J Neurophysiol*,  
591 102(4), 2538-2553. doi:10.1152/jn.91318.2008
- 592 Lévesque, M., Herrington, R., Hamidi, S., & Avoli, M. (2016). Interneurons spark seizure-like activity  
593 in the entorhinal cortex. *Neurobiol Dis*, 87, 91-101. doi:10.1016/j.nbd.2015.12.011
- 594 Lévesque, M., Salami, P., Gotman, J., & Avoli, M. (2012). Two seizure-onset types reveal specific  
595 patterns of high-frequency oscillations in a model of temporal lobe epilepsy. *J Neurosci*, 32(38),  
596 13264-13272. doi:10.1523/jneurosci.5086-11.2012
- 597 Li, J., Grinenko, O., Mosher, J. C., Gonzalez-Martinez, J., Leahy, R. M., & Chauvel, P. (2020).  
598 Learning to define an electrical biomarker of the epileptogenic zone. *Hum Brain Mapp*, 41(2), 429-441.  
599 doi:10.1002/hbm.24813
- 600 Marceglia, S., Foffani, G., Bianchi, A. M., Baselli, G., Tamma, F., Egidi, M., & Priori, A. (2006).  
601 Dopamine-dependent non-linear correlation between subthalamic rhythms in Parkinson's disease. *J*  
602 *Physiol*, 571(Pt 3), 579-591. doi:10.1113/jphysiol.2005.100271



- 
- 603 Müller-Putz, G. R., Scherer, R., Brauneis, C., & Pfurtscheller, G. (2005). Steady-state visual evoked  
604 potential (SSVEP)-based communication: impact of harmonic frequency components. *J Neural Eng*,  
605 2(4), 123-130. doi:10.1088/1741-2560/2/4/008
- 606 Rosenblatt, M., Van Ness, JW. (1965). Estimation of the bispectrum. *Annals of Mathematical Statistics*,  
607 36:1120–1136. doi:10.1007/978-1-4419-8339-8\_23
- 608 Samarasinghe, R. A., Miranda, O. A., Buth, J. E., Mitchell, S., Ferando, I., Watanabe, M., . . . Novitch,  
609 B. G. (2021). Identification of neural oscillations and epileptiform changes in human brain organoids.  
610 *Nat Neurosci*, 24(10), 1488-1500. doi:10.1038/s41593-021-00906-5
- 611 Schiff, S. J., Colella, D., Jacyna, G. M., Hughes, E., Creekmore, J. W., Marshall, A., . . . Weinstein, S. R.  
612 (2000). Brain chirps: spectrographic signatures of epileptic seizures. *Clin Neurophysiol*, 111(6), 953-958.  
613 doi:10.1016/s1388-2457(00)00259-5
- 614 Sheremet, A., Burke, S. N., & Maurer, A. P. (2016). Movement Enhances the Nonlinearity of  
615 Hippocampal Theta. *J Neurosci*, 36(15), 4218-4230. doi:10.1523/JNEUROSCI.3564-15.2016
- 616 Singh, S., Sandy, S., & Wiebe, S. (2015). Ictal onset on intracranial EEG: Do we know it when we see it?  
617 State of the evidence. *Epilepsia*, 56(10), 1629-1638. doi:10.1111/epi.13120
- 618 Sivaraju, A., Hirsch, L., Gaspard, N., Farooque, P., Gerrard, J., Xu, Y., . . . Spencer, D. D. (2022).  
619 Factors Predicting Outcome After Intracranial EEG Evaluation in Patients With Medically Refractory  
620 Epilepsy. *Neurology*, 99(1), e1-e10. doi:10.1212/WNL.0000000000200569

- 
- 621 Slaght, S. J., Paz, T., Chavez, M., Deniau, J. M., Mahon, S., & Charpier, S. (2004). On the activity of  
622 the corticostriatal networks during spike-and-wave discharges in a genetic model of absence epilepsy. *J*  
623 *Neurosci*, 24(30), 6816-6825.
- 624 Stam, C. J. (2005). Nonlinear dynamical analysis of EEG and MEG: review of an emerging field. *Clin*  
625 *Neurophysiol*, 116(10), 2266-2301. doi:10.1016/j.clinph.2005.06.011
- 626 Velazquez, J. L., & Carlen, P. L. (1999). Synchronization of GABAergic interneuronal networks during  
627 seizure-like activity in the rat horizontal hippocampal slice. *Eur J Neurosci*, 11(11), 4110-4118.  
628 doi:10.1046/j.1460-9568.1999.00837.x
- 629 Wang, M. Y., Wang, J., Zhou, J., Guan, Y. G., Zhai, F., Liu, C. Q., . . . Luan, G. M. (2017). Identification  
630 of the epileptogenic zone of temporal lobe epilepsy from stereo-electroencephalography signals: A  
631 phase transfer entropy and graph theory approach. *Neuroimage Clin*, 16, 184-195.  
632 doi:10.1016/j.nicl.2017.07.022
- 633 Wang, S., So, N. K., Jin, B., Wang, I. Z., Bulacio, J. C., Enatsu, R., . . . Najm, I. M. (2017). Interictal  
634 ripples nested in epileptiform discharge help to identify the epileptogenic zone in neocortical epilepsy.  
635 *Clin Neurophysiol*, 128(6), 945-951. doi:10.1016/j.clinph.2017.03.033
- 636 Weiss, S. A., Banks, G. P., McKhann, G. M., Jr., Goodman, R. R., Emerson, R. G., Trevelyan, A. J., &  
637 Schevon, C. A. (2013). Ictal high frequency oscillations distinguish two types of seizure territories in  
638 humans. *Brain*, 136(Pt 12), 3796-3808. doi:10.1093/brain/awt276

639           Wetjen, N. M., Marsh, W. R., Meyer, F. B., Cascino, G. D., So, E., Britton, J. W., . . . Worrell, G. A.  
640           (2009). Intracranial electroencephalography seizure onset patterns and surgical outcomes in nonlesional  
641           extratemporal epilepsy. *J Neurosurg*, *110*(6), 1147-1152. doi:10.3171/2008.8.Jns17643

642           Wilke, C., Worrell, G., & He, B. (2011). Graph analysis of epileptogenic networks in human partial  
643           epilepsy. *Epilepsia*, *52*(1), 84-93. doi:10.1111/j.1528-1167.2010.02785.x

644           Ziburkus, J., Cressman, J. R., Barreto, E., & Schiff, S. J. (2006). Interneuron and pyramidal cell  
645           interplay during in vitro seizure-like events. *J Neurophysiol*, *95*(6), 3948-3954.  
646           doi:10.1152/jn.01378.2005

647

648

649 **Figures and Tables**

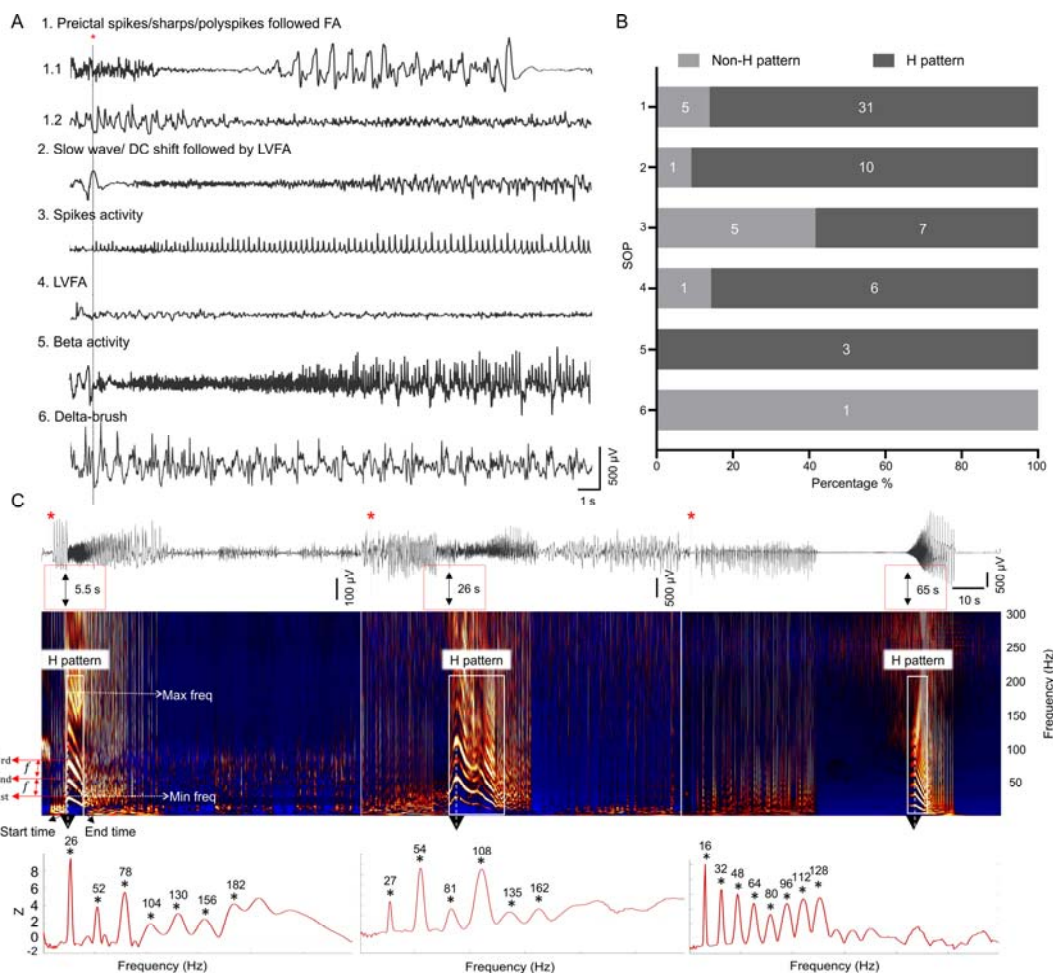

650

651 **Figure 1 H patterns recorded in seizures with various ictal EEG onset patterns. (A)** The six ictal

652 onset patterns defined on iEEG. **(B)** The percentage of patients presenting with certain EEG onset

653 patterns that did or did not exhibit the H pattern. **(C)** EEG (top) and corresponding TFM (middle) during

654 seizures. The TFM shows the 'harmonic pattern (H pattern)': multiple equidistant high-density, narrow

655 bands with varying frequency over time. The initial H patterns presented at various seizure stages on

656 TFM. The black double arrows in the red box mark the start time point of the H pattern. The power

657 spectral density corresponding to the maximal frequency of the H pattern (the black arrow)  
 658 demonstrates an equidistant distribution of the frequency bands (bottom). The frequency intervals were  
 659 26, 27, and 16 Hz, respectively. TFM: time frequency map; Max freq: maximal frequency; Min freq:  
 660 minimal frequency;  $f_{1st}$ : the first frequency band,  $f_{2st}$ : the second frequency band,  $f_{3st}$ : the third frequency  
 661 band;  $f$ : fundamental frequency (frequency interval). Red star: seizure onset.  
 662

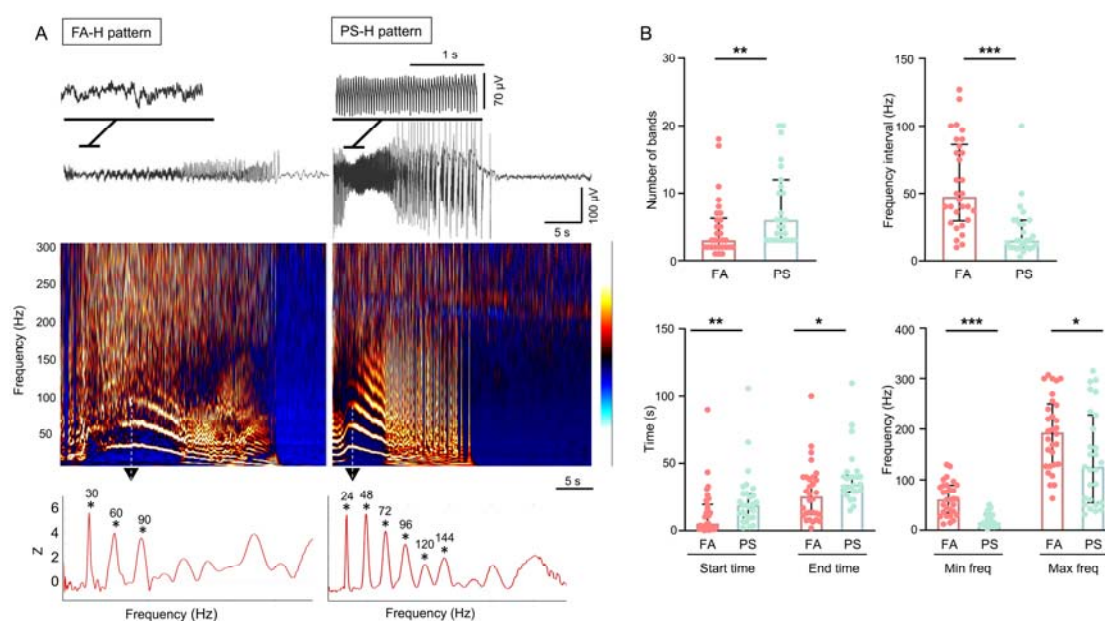

663  
 664 **Figure 2 Two types of EEG segments harboring H pattern. (A)** H pattern is presented in fast activity  
 665 (FA-H pattern) and irregular polyspikes (PS-H pattern) (top and middle). The power spectral density  
 666 (bottom) at the maximal frequency point shows an equidistant distribution of the frequency bands. **(B)**  
 667 Comparison of parameters between the FA-H pattern and PS-H pattern. The former showed a fewer  
 668 number of frequency bands (3 (4) vs. 6 (8)), higher frequency interval (47.5 (56.75) vs. 15 (20.00) Hz),  
 669 earlier start (5.2 (18.19) vs. 18.70 (17.20) s) and end (25.4 (28.30) vs. 33.9 (11.70) s) time, and higher

670 minimal (60 (54.70) vs. 15.00(20.00) Hz) and maximal (193.00 (120.75) vs. 126.00 (159.00) Hz)  
 671 frequencies than the latter. \* $P < 0.05$ ; \*\* $P < 0.01$ ; \*\*\* $P < 0.001$ . Max freq: maximal frequency; Min freq:  
 672 minimal frequency.

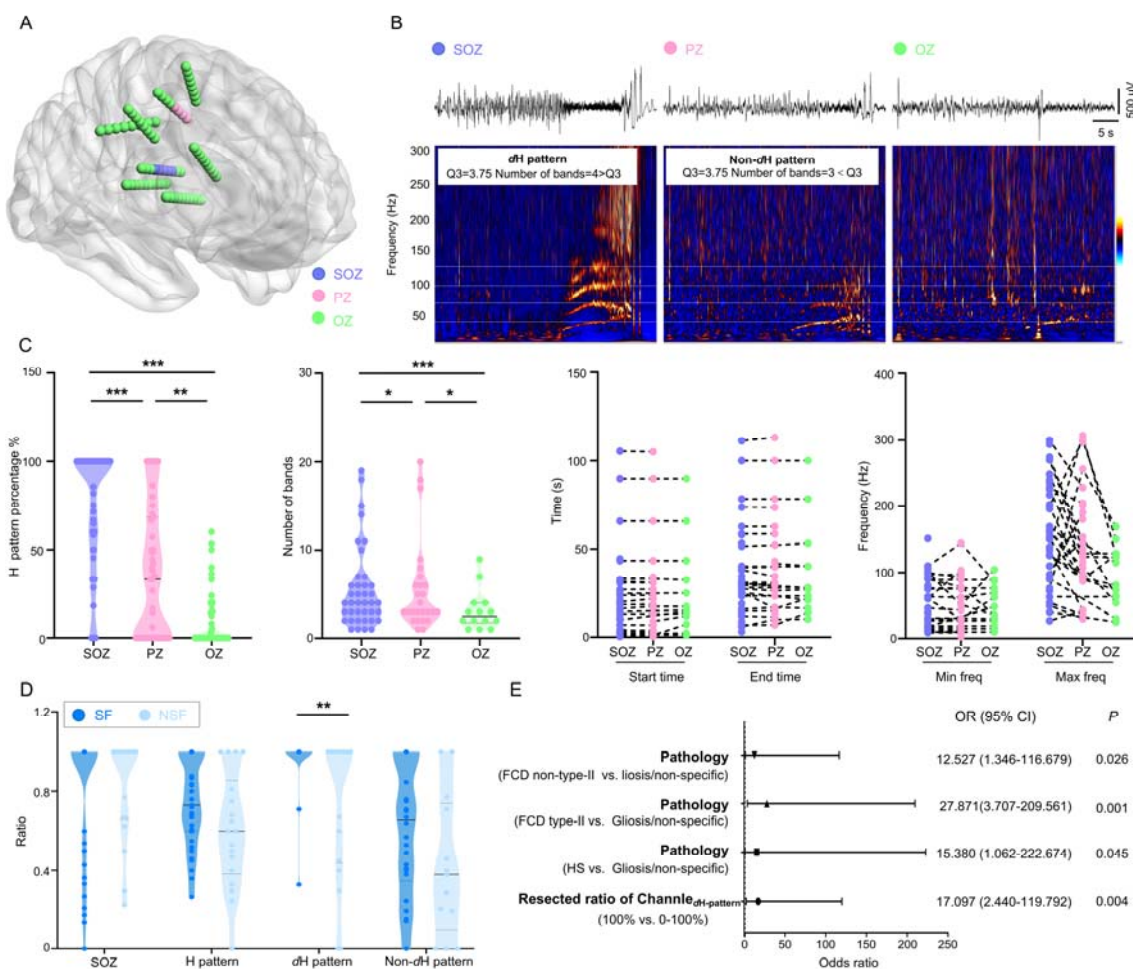

673  
 674 **Figure 3 Distribution of the H pattern. (A)** Anatomical distribution of SOZ, PZ, and OZ in a patient  
 675 (left panel). In this case, SOZ is located in the precentral gyrus with early propagation to the postcentral  
 676 gyrus. The right panel **(B)** shows the corresponding EEG recordings from SOZ, PZ, and OZ, along with  
 677 the observed H pattern. Red stars indicate seizure onset. **(C)** Comparison of parameters among SOZ,



678 PZ, and OZ in group data. The distribution percentage and the number of bands of H pattern decreases  
 679 in the order of SOZ, PZ, and OZ (Percentage%: SOZ: 100 (40), PZ: 33 (68), OZ: 0 (13). Number of  
 680 bands: SOZ: 4 (4), PZ: 2 (4), OZ: 0 (2)). **(D)** Resection of SOZ, H pattern, the *dH* pattern or non-*dH*  
 681 pattern and surgical outcome. **(E)** Multivariate logistic regression analysis. \* $P < 0.05$ ; \*\* $P < 0.01$ ; \*\*\* $P <$   
 682 0.001. Max freq: maximal frequency; Min freq: minimal frequency; SOZ: seizure onset zone; PZ: early  
 683 propagation zone; OZ: other zone. *dH* pattern: dominant H pattern.

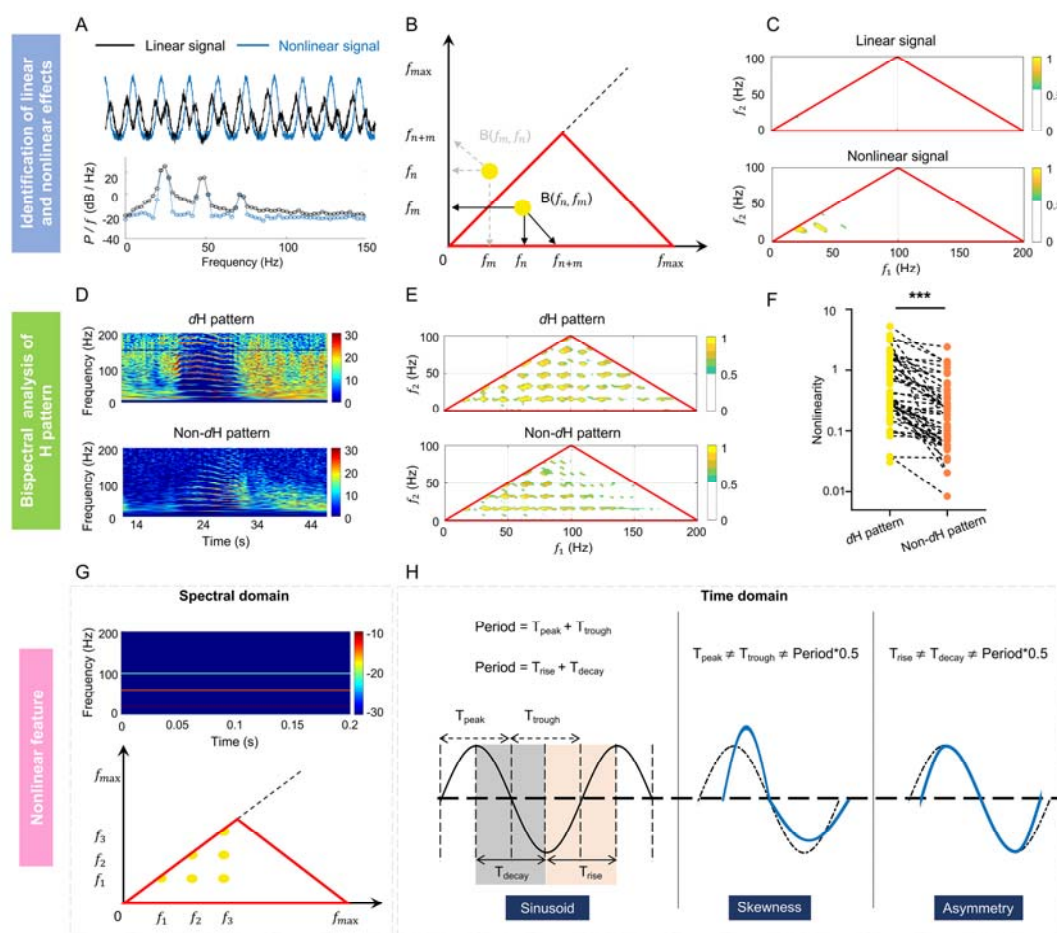

684

685 **Figure 4 Nonlinear analysis of H pattern.**

---

686 **Identification of linear and nonlinear effects: (A)** Linear and nonlinear signals (top) and their PSD  
687 (bottom). PSD analysis cannot distinguish between linear and nonlinear time series, as these two  
688 oscillations have similar spectral density characteristics. **(B)** Bispectral symmetry. The first diagonal  
689 serves as the axis of symmetry, with data on both sides being identical, and the red triangle represents  
690 the area containing nonredundant bispectral information. The peak in the bispectral estimate (yellow  
691 dot) represents a phase-coupled triplet  $(f_n, f_m, f_{n+m})$ . If a bispectral peak (yellow dot) is on the first  
692 diagonal, then  $m = n$ , meaning that frequency  $f_n$  is phase correlated to its second harmonic  
693  $f_{2n} = 2f_n$ . **(C)** Normalized bispectrum of linear and nonlinear signals. Bispectral analysis can  
694 distinguish the linear and nonlinear characteristics of signals: the normalized bispectrum and all of its  
695 components for linear signal are approximately zero, whereas nonlinear signal exhibits four prominent  
696 peaks.

697 **Bispectral analysis of H patterns: (D)** Example of the  $dH$  and non- $dH$  patterns. **(E)** Example of  
698 normalized bispectrum for the  $dH$  and non- $dH$  patterns. In comparison to the non- $dH$  pattern, the  $dH$   
699 pattern exhibits more bicoherence peaks, signifying the presence of stronger harmonic phase coupling.

700 **(F)** Comparison of bispectral values between the  $dH$  patterns and non- $dH$  patterns in group data.

701 **Features of nonlinear effects: (G)** In the spectral domain, nonlinearity is expressed as a series of  
702 harmonics that are phase-locked to the fundamental frequency, as evident in both TFM (top) and  
703 bispectral analysis (bottom). **(H)** In the time domain, nonlinearity is manifested as the asymmetry and  
704 skewness of the waveform. The left side uses a sinusoidal wave example to illustrate the period, peak,  
705 trough, rise, and decay. The distorted blue waveforms on the right, relative to the sinusoidal wave



706 (black dashed line), exemplify skewness and asymmetry. PSD: power spectral density; DFT: discrete  
 707 Fourier transform; TFM: time frequency map.  
 708

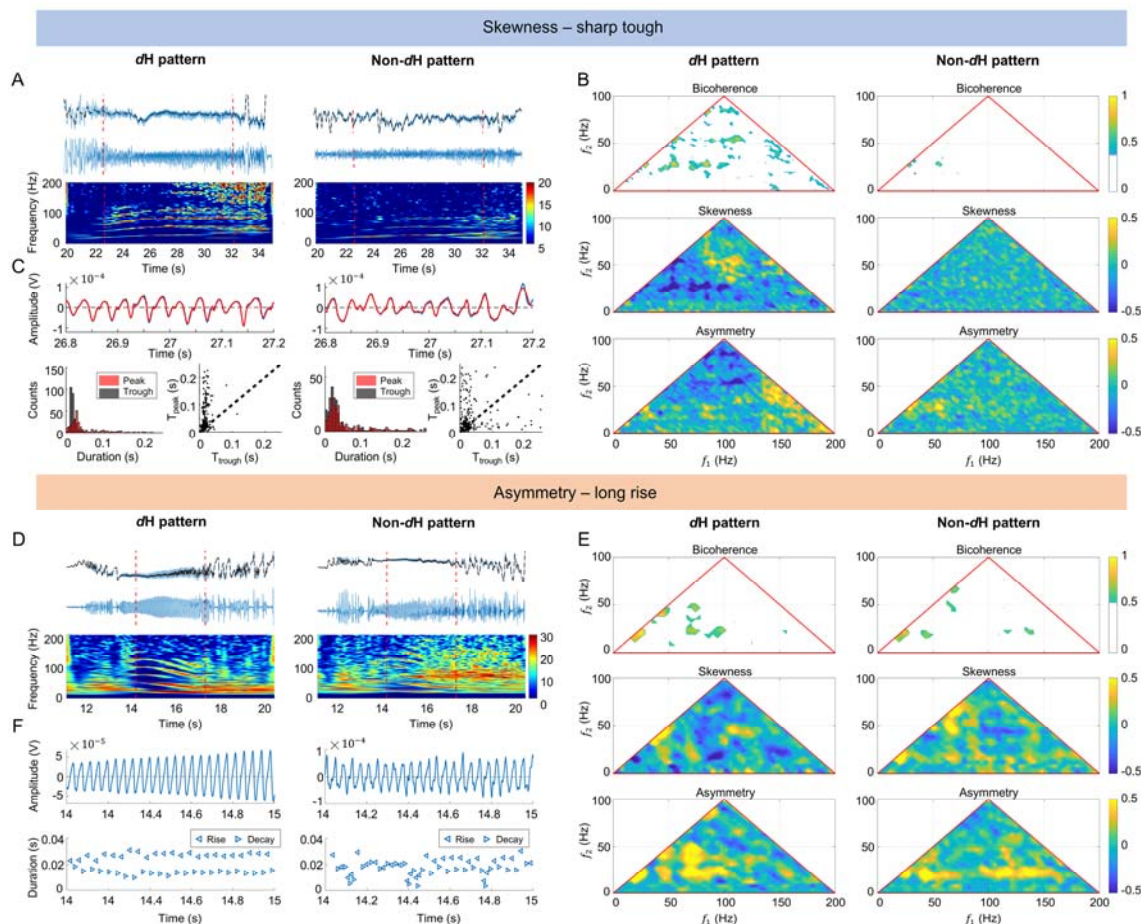

709  
 710 **Figure 5 Waveform analysis of H pattern. The dH pattern is attributed to stronger skewness**  
 711 **(sharper trough).** (A) Original iEEG signals in the dH/non-dH patterns (top), detrended iEEG signals  
 712 (middle), TFM (bottom); (B) Bispectral analysis for the dH/non-dH patterns. (C) Comparison of peak  
 713 and trough. Top: peaks and troughs (blue lines) in the dH/non-dH patterns are separately fitted by sin  
 714 waves (red lines), respectively; Bottom: Histogram (left) and scatter plot (right) depicting the distribution  
 715 of  $T_{\text{peak}}$  vs.  $T_{\text{trough}}$  for the dH/non-dH patterns.

716 **The dH pattern is attributed to stronger asymmetry (longer rise). (D)** Original iEEG signals in the  
717 dH/non-dH patterns (top), detrended iEEG signals (middle), TFM (bottom). **(E)** Bispectral analysis for  
718 the dH/non-dH patterns. **(F)** Comparison of rise and decay. Enlarged plots of detrended iEEG signals  
719 (top) and the corresponding rise (left triangles) and decay (right triangles) (bottom). The black dashed  
720 line in **A and D** represents the smoothed signals. The time with H pattern is marked by the red dotted  
721 vertical lines.

722

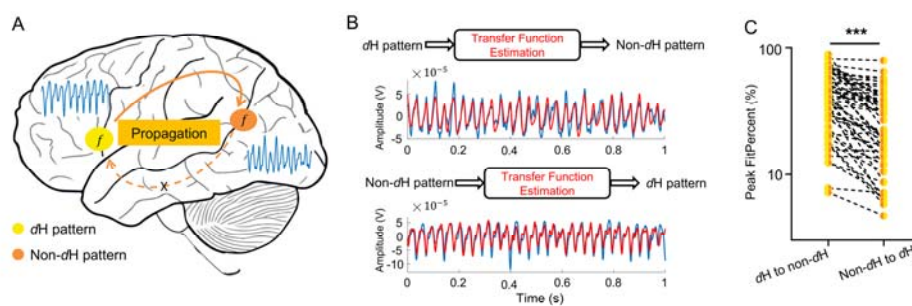

723

724 **Figure 6 Propagation analysis of H pattern (A)** Schematic of signal propagation from region with the  
725 dH pattern to one with the non-dH pattern but not the opposite. The two regions share the same  
726 fundamental frequency ( $f$ ). **(B)** Top: Estimating a transfer function with the input of dH pattern to fit  
727 non-dH pattern. Bottom: Estimating a transfer function with the input of non-dH pattern to fit dH pattern  
728 (blue: the input signal, red: the fitting signal). **(C)** Comparison of peak FitPercent between propagation  
729 from the dH pattern to the non-dH pattern and its opposite.  $*P < 0.05$ ;  $**P < 0.01$ ;  $***P < 0.001$ .  $f$ :  
730 fundamental frequency.

731

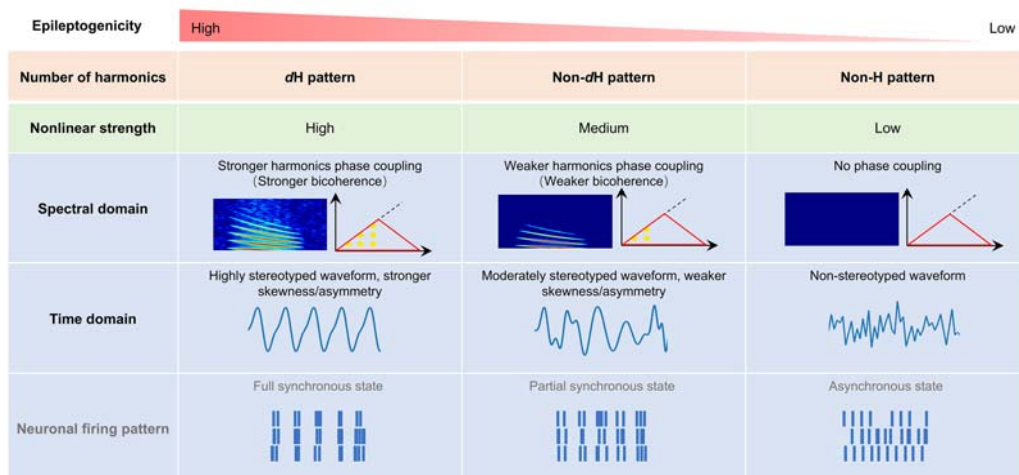

732

733 **Figure 7 Summary of the nonlinear features for H pattern.** The epileptogenicity, as reflected by the  
 734 nonlinear features of H pattern, exhibits a clear gradient of decrease from the dH pattern to non-dH  
 735 pattern, and is notably diminished in the non-H pattern. In the spectral domain, this is seen as a decline  
 736 in harmonic numbers in TFM and coupled peaks in bispectral analysis. In the time domain, the decline  
 737 is marked by reduced skewness and/or asymmetry of waveforms, with the dH pattern correlated with  
 738 more stereotyped waveforms. It is hypothesized that the harmonic nonlinearity reflects the  
 739 synchronization level of neuronal firing, which decreases from the dH pattern to non-dH pattern and is  
 740 absent in the non-H pattern.

741

742 **Table 1** Clinical characteristics and surgical outcomes in patients with focal onset pattern on iEEG.

|                                           | Total<br>(n = 57) | Seizure-free<br>(Engel class Ia)<br>(n = 39) | Not-seizure free<br>(> Engel class Ia)<br>(n = 18) | P value            |
|-------------------------------------------|-------------------|----------------------------------------------|----------------------------------------------------|--------------------|
| Gender, M, n (%)                          | 31 (54.4 %)       | 20 (51.3 %)                                  | 11 (61.1 %)                                        | 0.489 <sup>b</sup> |
| Age at onset, y                           | 10.4±8.5          | 9.4±7.5                                      | 12.6±10.2                                          | 0.193 <sup>a</sup> |
| Age at surgery, y                         | 23.6±12.3         | 23.6±12.8                                    | 23.7±11.3                                          | 0.991 <sup>a</sup> |
| Epilepsy duration, y                      | 13.3±11.2         | 14.2±11.8                                    | 11.1±9.6                                           | 0.329 <sup>a</sup> |
| EEG segments with H<br>pattern, FA/PS     | 30/27             | 20/19                                        | 10/8                                               | 0.764 <sup>b</sup> |
| Lateralization, L, n (%)                  | 26 (45.6 %)       | 18 (46.2 %)                                  | 8(44.4 %)                                          | 0.904 <sup>b</sup> |
| Epileptogenic lesion on<br>MRI, n (%)     | 49 (85.9 %)       | 35 (89.7 %)                                  | 14 (77.8 %)                                        | 0.246 <sup>c</sup> |
| Localization, n (%)                       |                   |                                              |                                                    | 0.243 <sup>c</sup> |
| Temporal                                  | 20 (35.1 %)       | 10 (25.6 %)                                  | 10 (55.6 %)                                        |                    |
| Frontal                                   | 24 (42.1 %)       | 18 (46.2 %)                                  | 6(33.3 %)                                          |                    |
| Parietal                                  | 4(7.0 %)          | 3 (7.7 %)                                    | 1(5.6 %)                                           |                    |
| Occipital                                 | 4(7.0 %)          | 4(10.3 %)                                    | 0(0.0 %)                                           |                    |
| Multi-lobar                               | 5(8.8 %)          | 4(10.3 %)                                    | 1(5.6 %)                                           |                    |
| Pathology, n (%)                          |                   |                                              |                                                    | 0.004 <sup>c</sup> |
| Hippocampal sclerosis                     | 6(10.5 %)         | 5 (12.8 %)                                   | 1 (5.6 %)                                          |                    |
| Focal cortical dysplasia<br>type II       | 28 (49.1 %)       | 23 (59 %)                                    | 5 (27.8 %)                                         |                    |
| Focal cortical dysplasia<br>(non-type II) | 11 (19.3 %)       | 7(17.9 %) <sup>d</sup>                       | 4 (22.2 %) <sup>d</sup>                            |                    |
| Tumor                                     | 2 (3.5 %)         | 2(5.1 %)                                     | 0(0.0 %)                                           |                    |
| gliosis/non-specific                      | 10 (17.5%)        | 2 (5.1 %) <sup>e</sup>                       | 8 (44.4 %) <sup>e</sup>                            |                    |

743 Abbreviations: iEEG: intracranial electroencephalography. M: male; y: years; H pattern: harmonic  
744 pattern; FA: fast activity; PS: periodic spike; L: left; MRI: magnetic resonance imaging; SF: seizure free;  
745 NSF: not seizure free. Data are presented as the number of patients for categorized variables and the  
746 mean ± standard deviation for continuous variables. a. Unpaired, two-tailed t-tests. b. Pearson's  
747 chi-square test. c. Fisher exact test. d & e. Bonferroni correction: In the SF and NSF groups, there was  
748 a discrepancy in pathological finding ( $P = 0.004$ ). A significant difference was found between FCD II  
749 and gliosis/non-specific findings.
